# Supplementary material for: Theranostic TEMPO-functionalized Ru(ii) complexes as photosensitizers and oxidative stress indicators
Source: Royal Society of Chemistry journal article supplement (doi:10.1039/c6dt04028d), 2016-12-01
Supplement: c6dt04028d1.pdf [file c6dt04028d1.pdf]

## Electronic Supporting Information

### Theranostic TEMPO-functionalized Ru(II) complexes as photosensitizers and oxidative stress indicators

Jing Yang,<sup>a</sup> Qian Cao,<sup>\*,a</sup> Wei-Liang Hu<sup>a</sup>, Rui-Rong Ye<sup>a</sup>, Liang He<sup>a</sup>, Liang-Nian Ji<sup>a</sup>, Peter Z. Qin<sup>b</sup> & Zong-Wan Mao<sup>\*,a</sup>

### Table of Contents

|                                                                                                         |    |
|---------------------------------------------------------------------------------------------------------|----|
| <b>Supporting Methods</b> .....                                                                         | 2  |
| Quantification of singlet oxygen generation .....                                                       | 2  |
| Cell lines and culture conditions .....                                                                 | 2  |
| Cellular uptake studies .....                                                                           | 3  |
| Cytotoxicity Assay .....                                                                                | 4  |
| Cell viability of cell co-incubated with H <sub>2</sub> O <sub>2</sub> .....                            | 4  |
| Detection of apoptosis .....                                                                            | 5  |
| Hoechst staining .....                                                                                  | 5  |
| Annexin V-FITC staining .....                                                                           | 5  |
| Measurement of Intracellular ROS (Flow cytometry) .....                                                 | 5  |
| Monitoring intracellular Fluorescence Intensity .....                                                   | 6  |
| Flow cytometry .....                                                                                    | 6  |
| Confocal microscopy .....                                                                               | 6  |
| <b>Supporting Figures and Tables</b> .....                                                              | 7  |
| Fig. S1 ESI-MS and <sup>1</sup> H NMR spectrum.....                                                     | 7  |
| Fig. S2 EPR signal of complex <b>1</b> and <b>3</b> .....                                               | 12 |
| Fig. S3 UV/Vis and emission spectra of complexes <b>1</b> , <b>1a</b> , <b>2</b> , <b>2a</b> .....      | 13 |
| Fig. S4 Emission and ESR spectra of <b>1</b> in presence of O <sub>2</sub> • <sup>-</sup> .....         | 13 |
| Fig. S5 Emission and ESR spectra of <b>1</b> in presence of H <sub>2</sub> O <sub>2</sub> and GSH ..... | 13 |
| Fig. S6 Confocal images of complexes <b>1</b> , <b>1a</b> , <b>2</b> , <b>2a</b> .....                  | 14 |
| Fig. S7 Visible light dose-dependent                                                                    |    |

---

|                                                                                                                                               |    |
|-----------------------------------------------------------------------------------------------------------------------------------------------|----|
| cytotoxicity.....                                                                                                                             | 15 |
| Fig. S8 Concentration-dependent inhibition of NaN <sub>3</sub> on cell death.....                                                             | 16 |
| Fig. S9 Cell viability evaluation of Hela cell co-inubated with H <sub>2</sub> O <sub>2</sub> .....                                           | 16 |
| Fig. S10 Analysis of ROS levels by flow cytometry.....                                                                                        | 17 |
| Fig. S11 Hoechst 33342 staining .....                                                                                                         | 18 |
| Table S1 Crystallographic data of Ligand .....                                                                                                | 19 |
| Table S2 Selected bond lengths (Å) and bond angles (deg) of Ligand.....                                                                       | 20 |
| Table S3 Photophysical data of complexes <b>1-2</b> , <b>1a-2a</b> .....                                                                      | 20 |
| Table S4 The <sup>1</sup> O <sub>2</sub> quantum yields (Φ <sub>Δ</sub> ) of <b>1</b> , <b>1a</b> , <b>2</b> , <b>2a</b> in aerated DMSO .... | 21 |
| Table S5 Cellular uptake efficiency of <b>1</b> , <b>1a</b> , <b>2</b> , <b>2a</b> measured by ICP-MS...                                      | 21 |

## Supporting Methods

### **Quantification of singlet oxygen generation**

The <sup>1</sup>O<sub>2</sub> quantum yields (Φ<sub>Δ</sub>) of Ru( II ) complexes were detected according to the literature procedure<sup>1</sup> with slight modifications. The DMSO solutions containing **1**, **1a**, **2**, **2a** and DPBF (50 μM) were aerated for 10 min, then photo irradiated at 450 (25W·cm<sup>-2</sup>). Every 2 s, the absorbance of DPBF at 418 nm was recorded. MB was used as the reference (Φ<sub>Δ</sub> = 0.52). The absorbance at 450 nm of Ru( II )complexes and MB was kept at 0.15. The <sup>1</sup>O<sub>2</sub> quantum yields of Ru complexes were calculated according the following equation:

$$\Phi_{\Delta}(x) = \Phi_{\Delta}(std) \times \left(\frac{S_x}{S_{std}}\right) \times \left(\frac{F_{std}}{F_x}\right)$$

where S is the slope of a linear fit of the change of absorbance at 418 nm against the irradiation time(s) and F is the absorption correction factor, which is given by  $F = 1 - 10^{-OD}$  (OD is the optical density at the irradiation wavelength).

---

### **Cell lines and culture conditions**

HeLa, A549, A549R and LO2 cells were obtained from Experimental Animal Center of Sun Yat-sen University (Guangzhou, China). The Cells were maintained in DMEM (Dulbecco's modified Eagle's medium, Gibco BRL) or RPMI 1640 (Roswell Park Memorial Institute 1640, Gibco BRL) medium containing 10% FBS (fetal bovine serum, Gibco BRL), 100 µg/mL streptomycin, and 100 U/mL penicillin (Gibco BRL). The cells were cultured in a humidified incubator at 37 °C under 5% CO<sub>2</sub>. A549R cells were cultured in a medium containing increasing concentrations of cisplatin to maintain the resistance. In each experiment, cells treated with DMSO (1%, v/v) only were used as the reference group .

### **Cellular uptake studies**

#### **Confocal microscopy**

HeLa cells were seeded into 35 mm dishes (Corning) for confocal microscopy. The cells were incubated with **1**, **1a**, **2**, **2a** for 12 h or 24 h and washed twice with cold PBS, then viewed immediately by a confocal laser-scanning microscope by excitation at 488 nm or 800 nm. The emission filters used are 620 ± 20 nm.

#### **ICP-MS**

Hela cells were seeded in 10 cm tissue culture dishes and incubated for 24 h. The medium was removed and replaced with fresh medium containing the tested complexes (15 µM). The cells were washed with PBS, trypsinized and collected after 24 h incubation. The cells were counted, and digested with HNO<sub>3</sub> (65%, 2 mL) at 60 °C for 1 h. The solution was then diluted to a final volume of 10 mL with Milli-Q water. The concentration of ruthenium was measured using the XSERIES 2 ICP-MS.

### **Cytotoxicity Assay<sup>2</sup>**

The dark cytotoxicity and phototoxicity of the tested compounds toward Hela, A549, A549cisR, and LO2 cell lines was determined by MTT assay.

#### **Dark cytotoxicity**

---

Cells cultured in 96-well plates were grown to confluence. The compounds were dissolved in DMSO (1%, v/v), and diluted with fresh media immediately. The cells were incubated with a series of concentrations of the tested compounds for 44 h at 37 °C. 20  $\mu$ L MTT solution then added to each well, and the plates were incubated for an additional 4 h. The media was removed, and DMSO was added (150  $\mu$ L per well) and incubated for 10 min with shaking. The absorbance at 595 nm was measured using a microplate reader (Infinite M200 Pro, Tecan, Männedorf, Switzerland).

### **Photo-toxicity**

Cells were incubated with the tested compounds for 24 h. The media containing the Ru complexes was removed and fresh media without the complexes was added. Irradiated with a 450 nm LED light array (25 mW cm<sup>-2</sup>) for 5min (7.5 J cm<sup>-2</sup>), incubated for another 20 h, MTT was added and incubated for an additional 4 h. For Concentration-dependent inhibition of NaN<sub>3</sub> (5 and 10 mM) on cell death assay, complex **1** was incubated with Hela for 24h, media was removed and fresh media without the complexes was added. NAC was added 1h before irradiation, cell was incubated for another 19 h, the cytotoxicity was determined as described above. The cytotoxicity was determined as described above. No statistical difference in viability was observed between cells kept in the dark and cells irradiated.

### **Cell viability of cell co-incubated with H<sub>2</sub>O<sub>2</sub>**

Cells cultured in 96-well plates were grown to confluence, complex **1** (2 and 5  $\mu$ M) was added into cell and incubated for 24h. Then, H<sub>2</sub>O<sub>2</sub> diluted with PBS buffer was added to induce oxidative stress, the cell were incubated for 30 min and then washed twice with PBS, 20  $\mu$ L MTT solution then added to each well. The cytotoxicity was determined as described above.

### **Detection of apoptosis**

#### **Hoechst staining**

HeLa cells were seeded into 35 mm dishes (Corning) and incubated for 24 h and then treated with complex **1** for 24 h. Photo-irradiation (450 nm, 25 mW·cm<sup>-2</sup>, 5 min) was

---

performed and the cells were then washed twice with cold PBS and fixed with 4% paraformaldehyde at room temperature for 10 min. After washed with cold PBS, cells were labeled with Hoechst 33342 (5  $\mu\text{g/mL}$  in PBS) for 5 min. The cells were analyzed immediately with a confocal laser-scanning microscope.

#### **Annexin V-FITC staining**

In flow cytometry, HeLa cells were cultured in 6-well tissue culture plates for 24 h and then treated with complex 1 (1  $\mu\text{M}$ ) for 24 h. PDT treatment was carried out as described in Hoechst Staining. The cells were harvested and stained using an annexin V-FITC apoptosis detection kit (Sigma Aldrich) according to the manufacturer's instructions. Data were collected by flow cytometer and analyzed with FlowJo 7.6 software. In confocal microscopy, cells were washed twice with ice-cold PBS, and stained with FITC-labelled annexin at 37  $^{\circ}\text{C}$  for 15 min in the dark, then visualized immediately by confocal microscopy

#### **Measurement of Intracellular ROS (Flow cytometry)**

HeLa cells were seeded into 6-well tissue culture plates (Corning) for 24 h and then treated with complex 1 or 1a for 24 h, followed by the irradiation (450 nm, 25  $\text{mW}\cdot\text{cm}^{-2}$ , 5 min). After washed twice with serum-free DMEM, the fluorescence intensity of cells was measured immediately by flow cytometry with excitation at 488 nm and emission at 530 nm. Green mean fluorescence intensities were analyzed using FlowJo 7.6 software.

The effect of 1-1a on HeLa Cells against  $\text{H}_2\text{O}_2$ -induced oxidative damage was also checked by flow cytometry. After incubation with complex 1 or 1a for 24 h at the indicated concentrations for 24 h, 2 mM  $\text{H}_2\text{O}_2$  was added into each wells and incubated for another 30 min at 37  $^{\circ}\text{C}$  and 5%  $\text{CO}_2$ . Then  $\text{H}_2\text{O}_2$  was carefully removed and the cell was washed with PBS twice immediately before further characterization by flow cytometry.

---

## **Monitoring the intracellular Fluorescence Intensity of **1** & **1a****

### **Flow cytometry**

HeLa cells were seeded into 6-well tissue culture plates (Corning) for 24 h and then incubated with complex **1** or **1a** at the indicated concentrations for 24 h in the dark, followed by another incubation with light irradiation (25 mW cm<sup>-2</sup>, 5 min) or H<sub>2</sub>O<sub>2</sub> co-incubation (2 mM, 30 min). After washed twice with PBS, the cells were harvested and the fluorescence intensity of cells was measured immediately by flow cytometry with excitation at 488 nm and emission at 585 ± 21 nm.

### **Confocal microscopy**

HeLa cells were seeded into 35 mm dishes (Corning) and incubated for 24 h and then treated with complex **1** (10 µM) for 24 h. Light irradiation and H<sub>2</sub>O<sub>2</sub> co-incubation were carried out as described above. The cells were washed twice with ice-cold PBS, then visualized immediately by confocal microscopy.

### **Statistical analysis**

All biological experiments were performed at least twice with triplicates in each experiment. Representative results were depicted in this report and data were presented as means ± standard deviations.

## Supporting Figures and Tables

D:\Data\2015\12\Cao Qian\1512A0813-2  
TSQ Quantum Ultra

12/28/2015 9:29:35 AM

Tempo

1512A0813-2-#9 RT: 0.08 AV: 1 SB: 3 0.02-0.04, 0.23-0.25 NL: 1.03E8  
F: + c ESI Q1MS [100.000-1500.000]

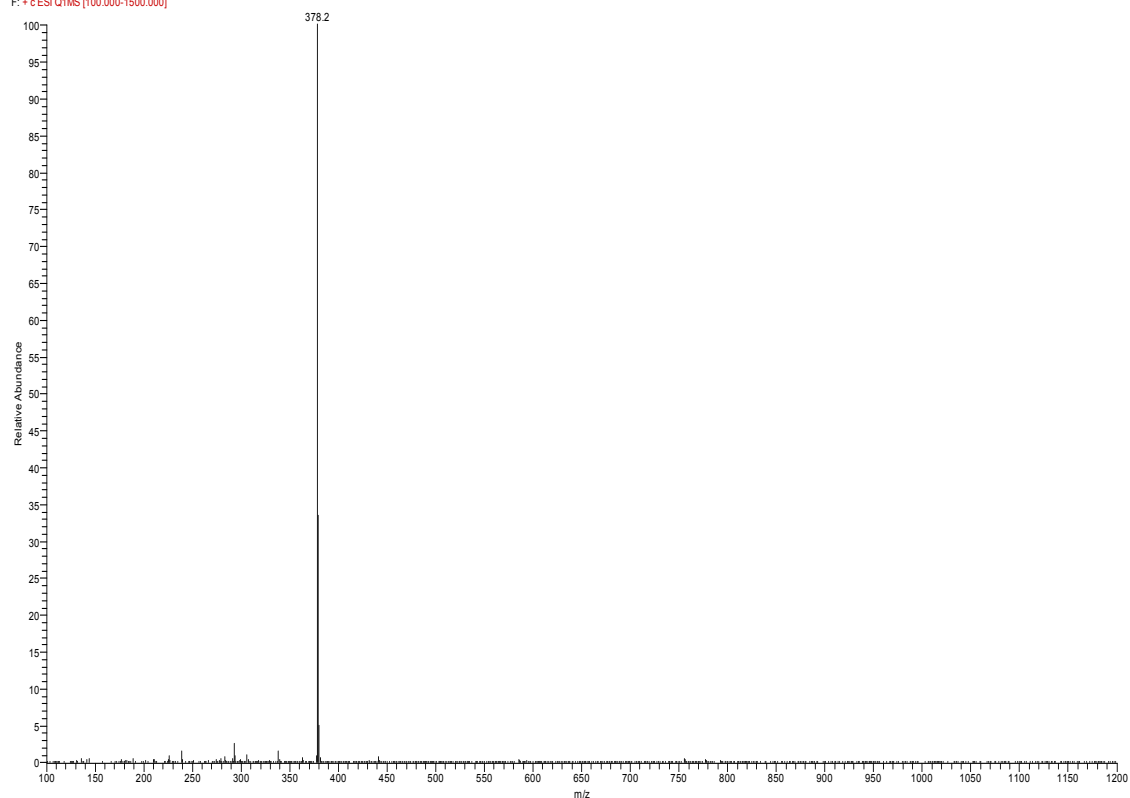

**Fig. S1 (a)** ESI-MS spectrum of ligand **L**, 378.2,  $[M+H]^+$ ; Elemental analysis: Calcd(%) for  $C_{22}H_{25}N_4O_2 \cdot 1CH_3CN \cdot 1H_2O$  : C, 66.03; H, 6.93; N, 16.04; C/N, 4.117; C/H, 9.528 ; Found: C, 66.07; H, 6.955; N, 15.99; C/N,4.131; C/H, 9.499 ;

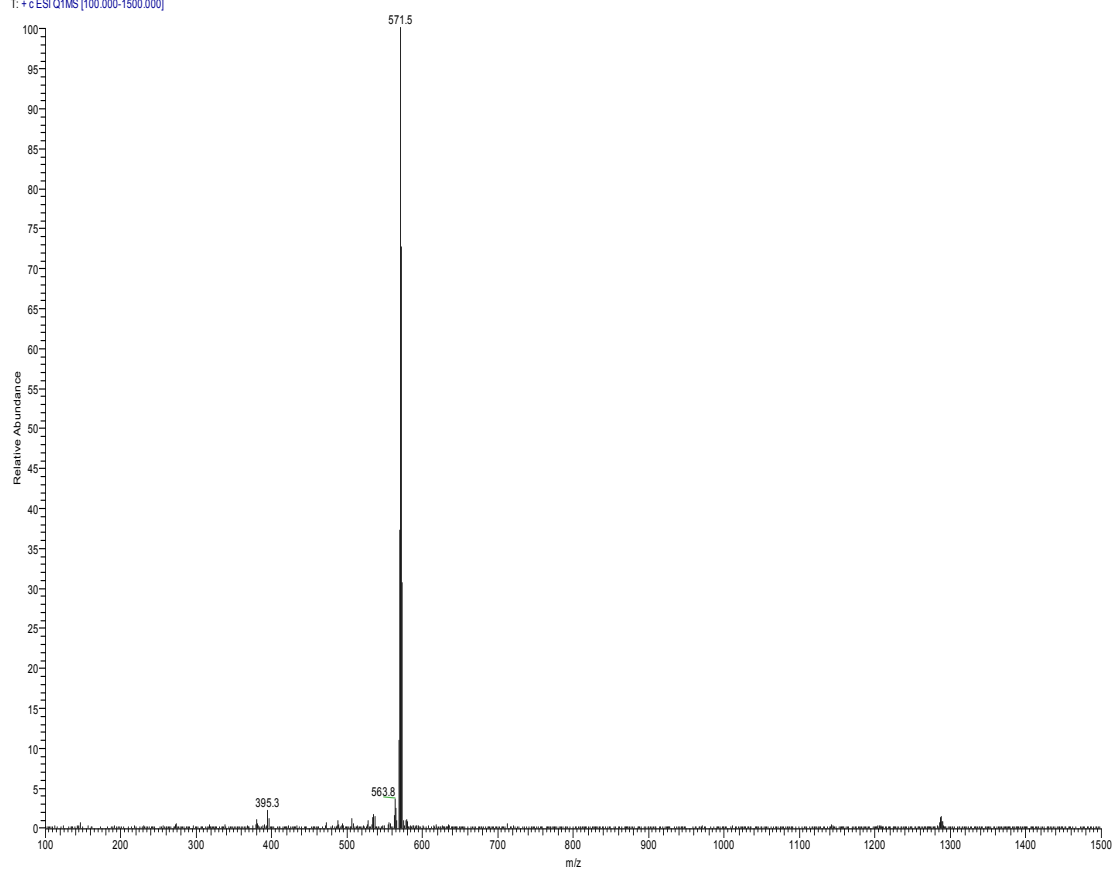

**Fig. S1 (b)** ESI-MS spectrum of complex **1**, 571.5 ,  $1/2[M+H]^{2+}$ ; Elemental analysis calcd(%) for  $C_{74}H_{71}F_{12}N_8O_5P_2Ru \cdot 2CH_3OCH_3 \cdot 1H_2O$ : C, 57.59; H, 4.64; N, 7.26; C/N, 7.932; C/H, 12.412 ; found: C, 57.53; H, 4.68; N, 7.05; C/N,8.160;C/H, 12.292;



1511A0416 #3 RT: 0.09 AV: 1 SB: 1 0.00 NL: 8.09E8  
F: + c ESI Full ms [50.00-2000.00]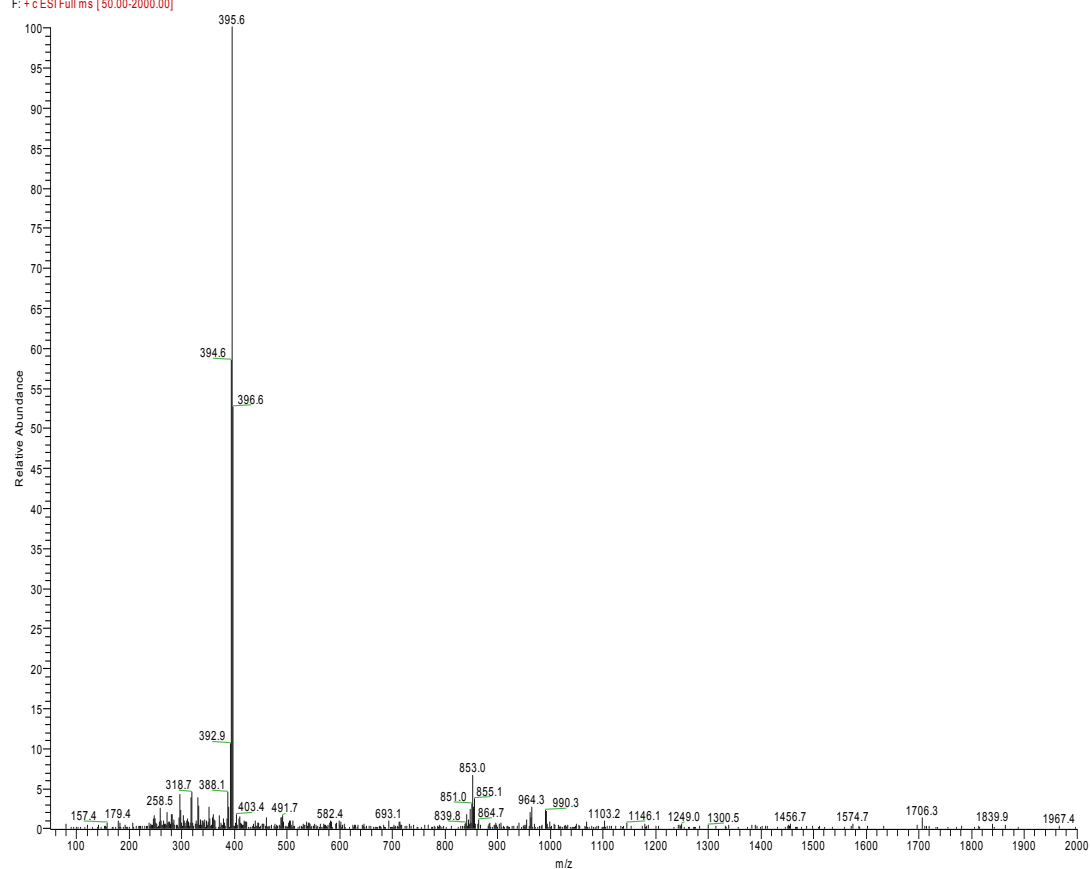

**Fig. S1 (c)** ESI-MS spectrum of complex **2**, 395.6,  $1/2[M+H]^{2+}$ ; Elemental analysis calcd(%) for  $C_{42}H_{41}F_{12}N_8O_2P_2Ru \cdot 1CH_3OCH_3 \cdot 1H_2O$ : C, 46.16; H, 4.31; N, 9.79; C/N, 4.715; C/H, 10.709; found: C, 46.24; H, 4.35; N, 9.81; C/N, 4.713; C/H, 10.629.

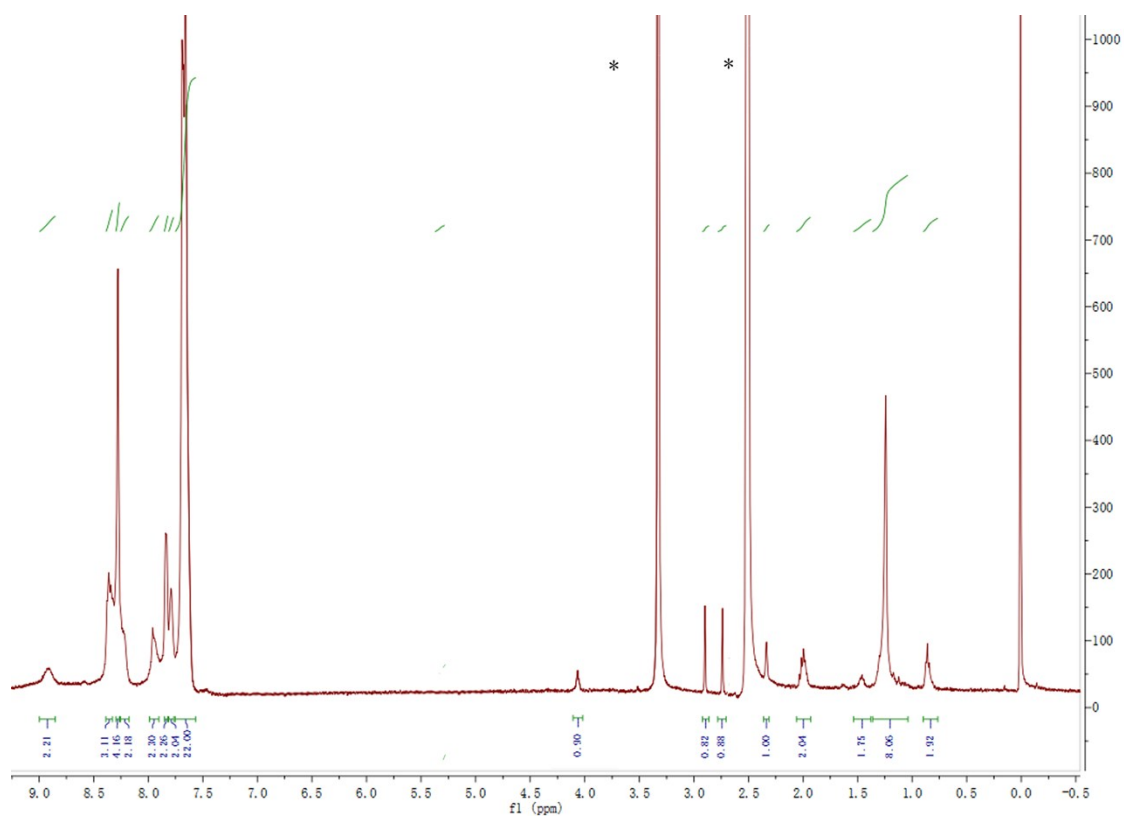

**Fig. S1 (d)** 400 MHz  $^1\text{H}$  NMR spectrum of complex **1** in dimethyl sulfoxide- $\text{d}_6$  (\*corresponds to residual solvents peaks of  $\text{H}_2\text{O}$  and dimethyl sulfoxide- $\text{d}_6$ ).

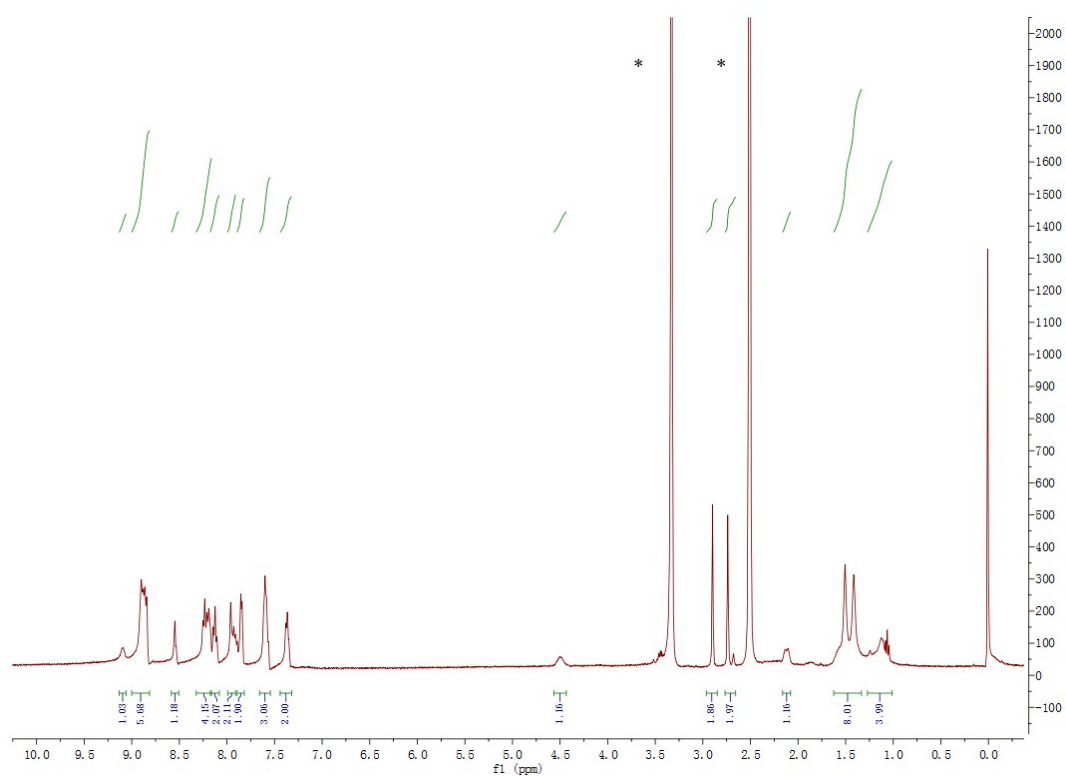

**Fig. S1 (e)** 400 MHz  $^1\text{H}$  NMR spectrum of complex **2** in dimethyl sulfoxide- $\text{d}_6$  (\*corresponds to residual solvents peaks of  $\text{H}_2\text{O}$  and dimethyl sulfoxide- $\text{d}_6$ ).

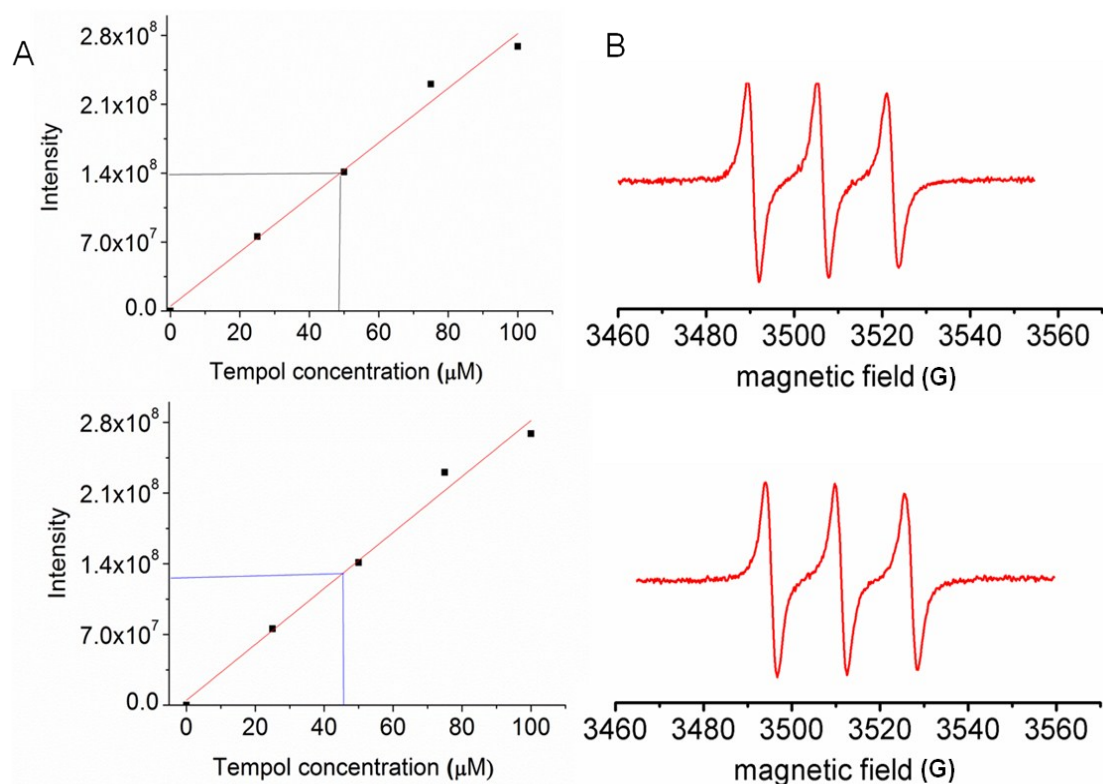

**Fig. S2** (A) ESR standard curve showed the intensity of the ESR signal as a function of the TEMPO concentration, accordingly determined the spin efficiency of complex **1-2**. (B) ESR spectra of  $5 \times 10^{-4}$  M of complex **1-2** in acetonitrile. Accordingly, effective spin concentration of complex **1** and **2** was determined to be 98% and 95%, respectively.

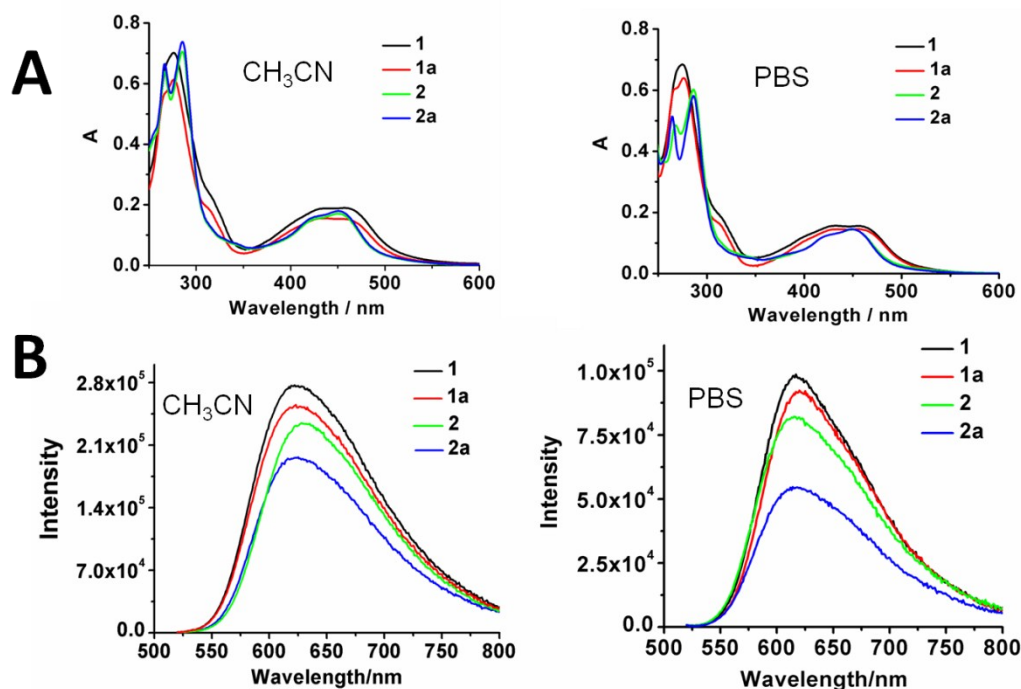

**Fig. S3** (A)UV/Vis and (B) emission spectra of complexes **1**, **1a**, **2**, **2a** (10  $\mu$ M) measured in  $\text{CH}_3\text{CN}$  and PBS at 298 K. (excitation at 450 nm).

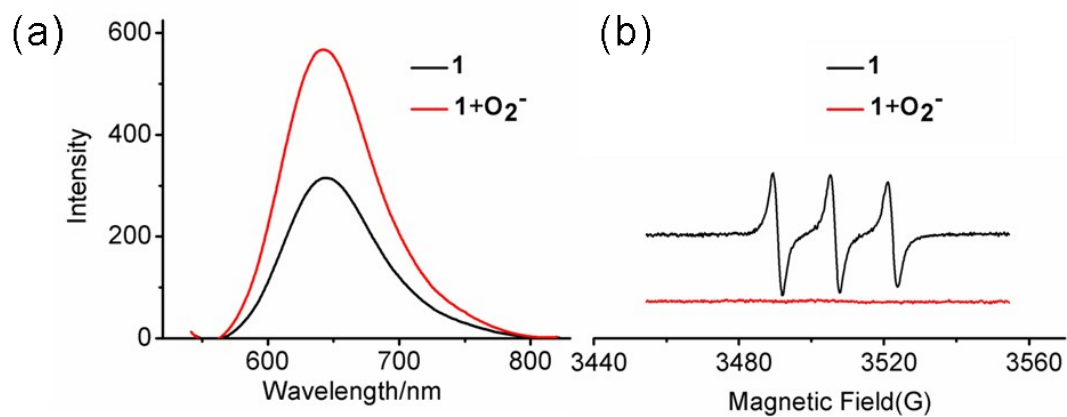

**Fig. S4** (a)Emission and (b) ESR spectra of **1** (30  $\mu$ M) recorded in phosphate buffer pH 8.2 in the presence of Xanthien(100 $\mu$ M)/Xanthine oxidase (100mU/ml) system which is the source of  $\text{O}_2^{\bullet-}$ .

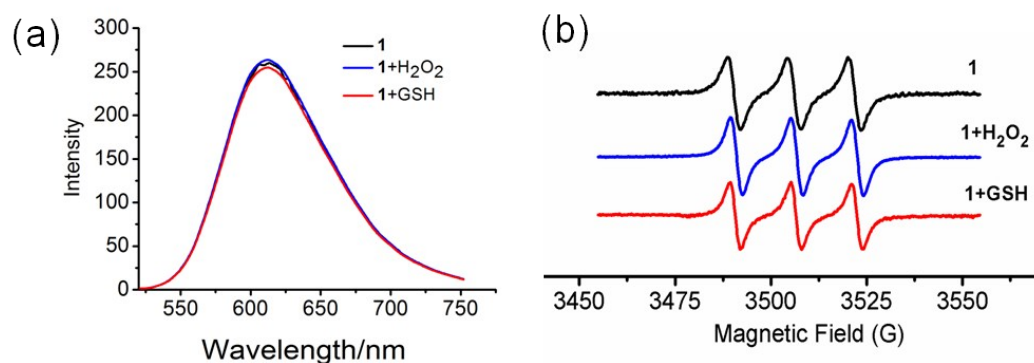

**Fig. S5** (a)Emission and (b) ESR spectra of **1** (30  $\mu$ M) recorded in phosphate buffer pH7.5 in the presence of H<sub>2</sub>O<sub>2</sub> or GSH ( $3 \times 10^{-3}$  M).

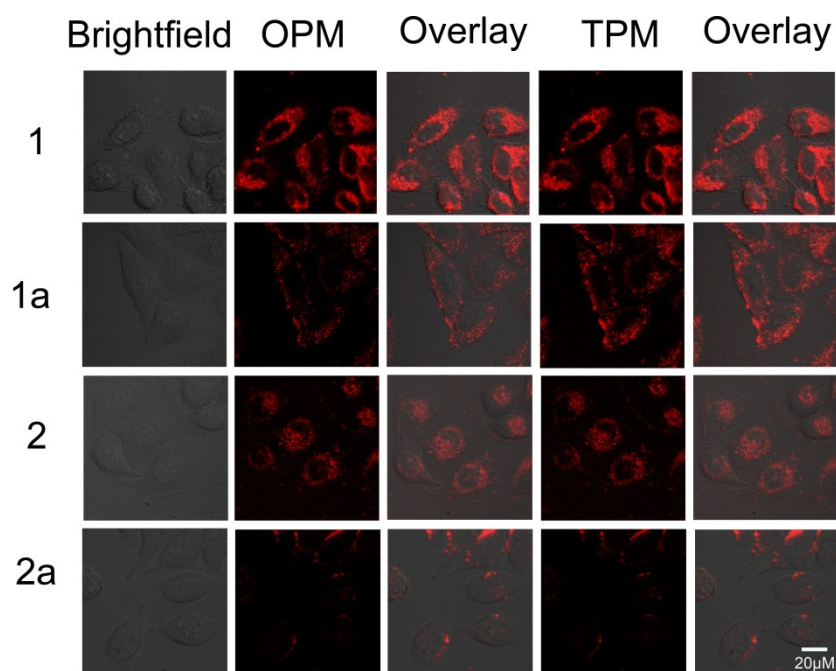

**Fig. S6** One-photon ( $\lambda_{\text{ex}} = 488$  nm) and two-photon ( $\lambda_{\text{ex}} = 800$  nm) confocal microscopic images ( $\lambda_{\text{em}} = 620 \pm 20$  nm) of HeLa cells recorded after treatment with complex **1**, **1a**, **2**, **2a** (20  $\mu$ M) for 24h in the dark.

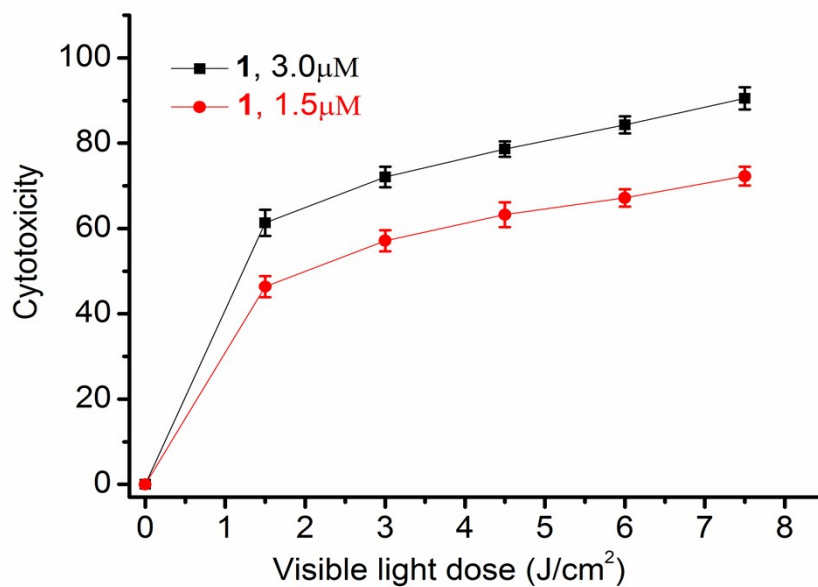

**Fig. S7** Visible light ( $\gamma_{\text{irr}} = 450\text{nm}$ ) dose-dependent cytotoxicity curve of complex **1** ( $3.0\ \mu\text{M}$  and  $1.5\ \mu\text{M}$ ) on monolayer Hela cells after 24h incubation in the dark. The MTT assay was performed 48h after PDT treatment. The results were expressed as the mean  $\pm$ S.D. of 3 replicate trials.

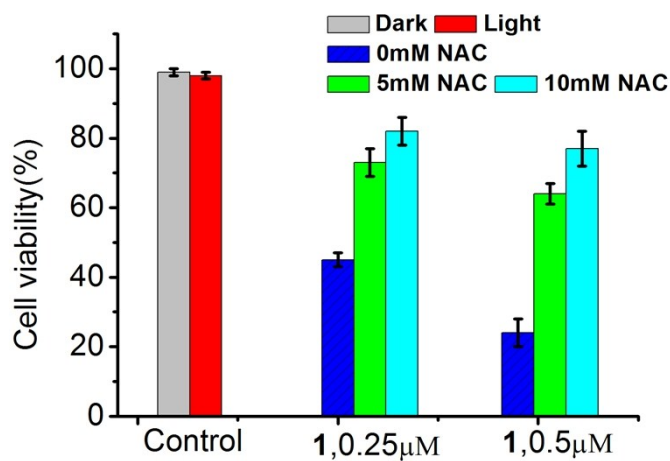

**Fig.S8** Concentration-dependent inhibition of  $\text{NaN}_3$  ( 5 and 10 mM) on **1**-induced Hela cell death during PDT ( irradiated at 450 nm 25mW $\cdot$ cm $^{-2}$ , 5min ).

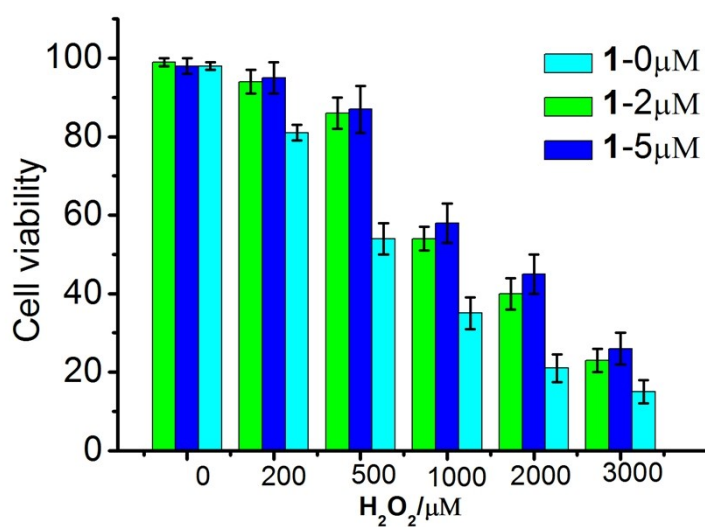

**Fig. S9** Cell viability evaluation of Hela cell co-incubated with  $\text{H}_2\text{O}_2$  for 30 min at the indicated concentration, the cell were incubated with complex **1** (2 and 5 $\mu$ M ) for 24h before addition of  $\text{H}_2\text{O}_2$ .



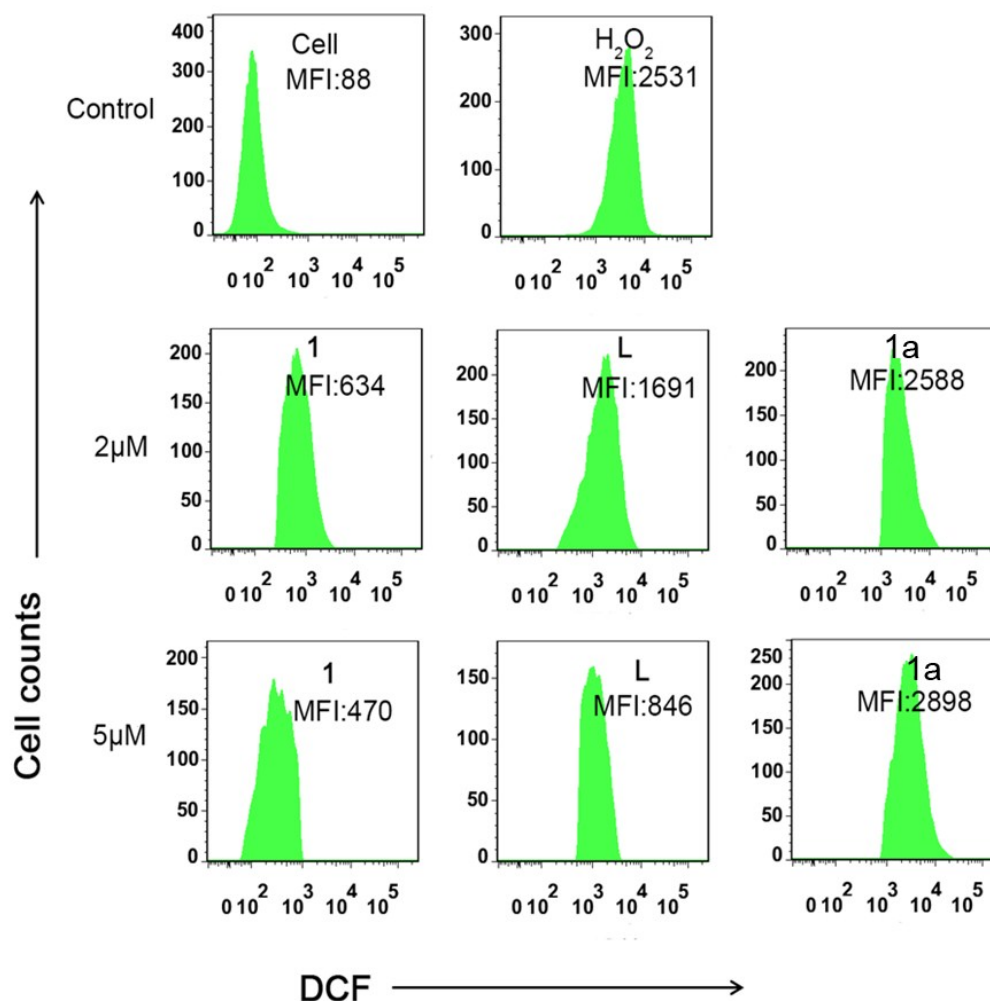

**Fig.S10** Analysis of ROS levels by flow cytometry after HeLa cells were treated complexes **1**, **1a** and **L** at the indicated concentrations for 24 h and then simulated with  $H_2O_2$  (2 mM, 30 min).

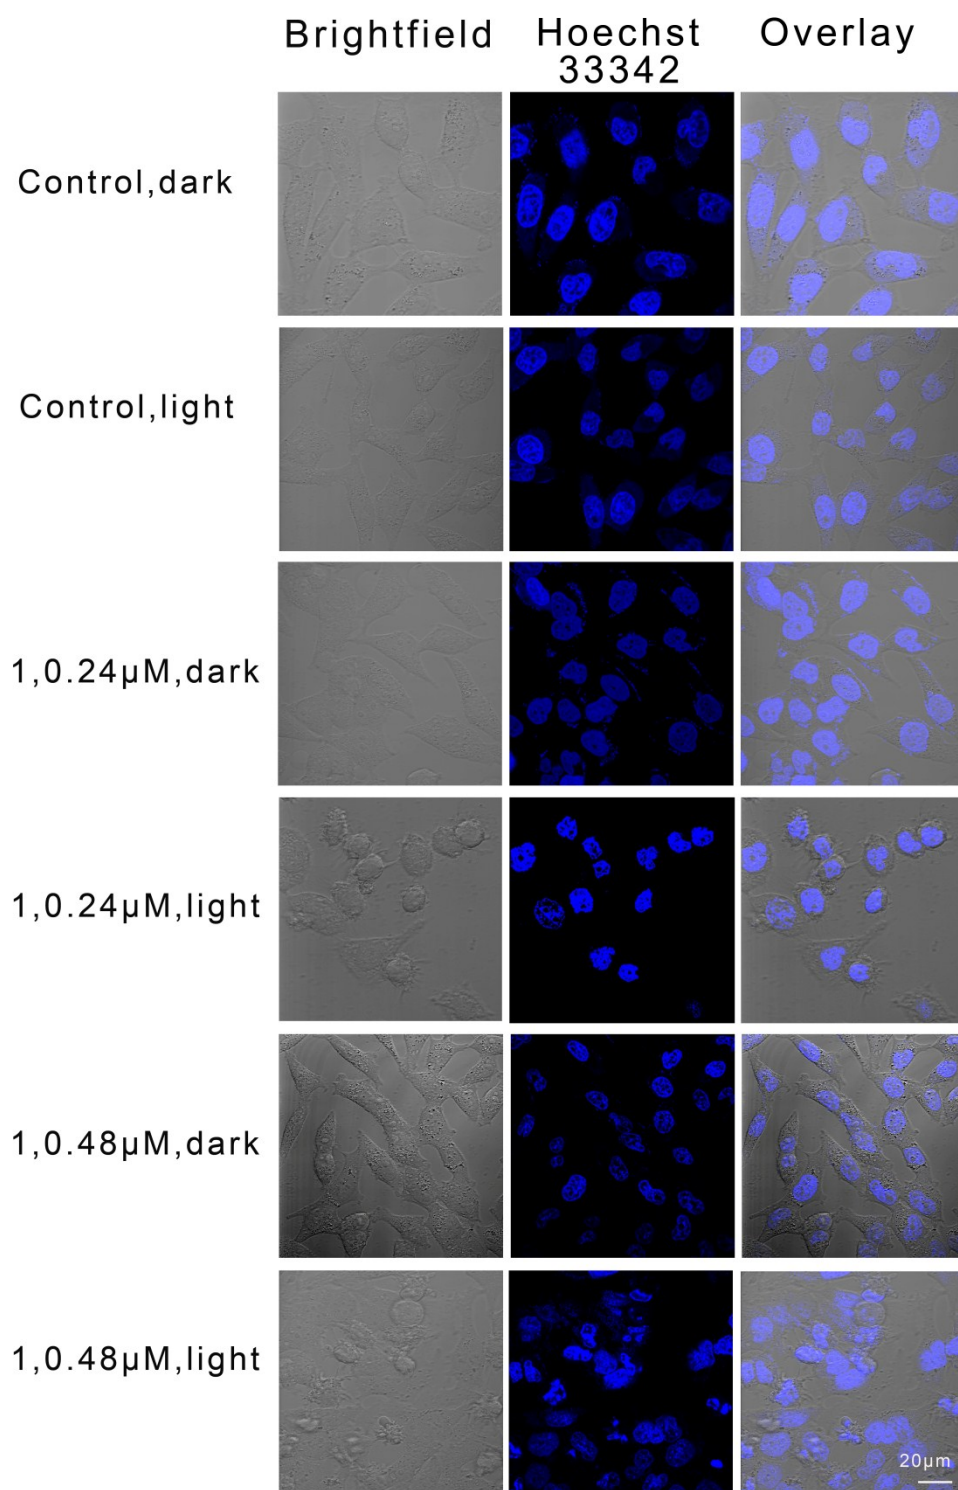

**Fig. S11** Characterization of apoptosis induced by complex **1** using Hoechst 33342 staining. **Dark:** Cells were incubated with <sup>1</sup>complex **1** for 24 h. **Light:** Cells were incubated <sup>2</sup>with complex **1** for 24 h in the dark, then irradiated at 450 nm (25mW·cm<sup>-2</sup>, 5 min), and visualized immediately by confocal microscopy.

**Table S1 Crystallographic data of Ligand L**

|                                           |                                                               |
|-------------------------------------------|---------------------------------------------------------------|
| Compound                                  | <b>L</b>                                                      |
| Empirical formula                         | C <sub>22</sub> H <sub>25</sub> N <sub>4</sub> O <sub>2</sub> |
| Molecular weight                          | 378                                                           |
| Description                               | Block, orange                                                 |
| Temperature (K)                           | 293 (2)                                                       |
| Crystal size (mm)                         | 0.2×0.2×0.2                                                   |
| Λ (Å)                                     | 0.71073                                                       |
| Crystal system                            | Monoclinic                                                    |
| Space group                               | P21/c                                                         |
| A (Å)                                     | 7.8442 (7)                                                    |
| B (Å)                                     | 23.492 (2)                                                    |
| C (Å)                                     | 12.4040 (11)                                                  |
| A (°)                                     | 90                                                            |
| B (°)                                     | 120.785 (5)                                                   |
| Γ (°)                                     | 90                                                            |
| Volume, Å <sup>3</sup>                    | 1964.2 (3)                                                    |
| Z                                         | 4                                                             |
| Absorption coefficient(mm <sup>-1</sup> ) | 0.084                                                         |
| F(000)                                    | 804.0                                                         |
| Θ range (deg)                             | 2.77-27.480                                                   |
| Completeness to θ <sub>max</sub>          | 0.985                                                         |
| Density(calcd)(mg/m <sup>-3</sup> )       | 1.273                                                         |
| [R <sub>int</sub> ]                       | 0.0487                                                        |
| Reflections collected/unique              | 14222/4434                                                    |
| R1 <sup>a</sup> [I > 2σ(I)]               | 0.0646                                                        |
| wR2 <sup>a</sup>                          | 0.2271                                                        |
| GOF <sup>b</sup>                          | 1.066                                                         |

$$^a R1 = \sum \|F_0\| - \|F_c\| / \sum \|F_0\|, wR2 = \left\{ \sum \left[ w(F_0^2 - F_c^2)^2 \right] / \sum \left[ w(F_0^2)^2 \right] \right\}^{1/2}$$

$$^b GOF = \left\{ \sum \left[ w(F_0^2 - F_c^2)^2 / (n - p) \right] \right\}^{1/2} \text{ where } n \text{ is the number of data and } p \text{ is the number of parameters refined.}$$

**Table S2** Selected bond lengths (Å) and bond angles (deg) of **L**

|                   | Ligand         |             |
|-------------------|----------------|-------------|
|                   |                |             |
| bond lengths (Å)  | N1 – C1        | 1.328 (3)   |
|                   | N2 – C11       | 1.312 (4)   |
|                   | O2 – N4        | 1.288 (2)   |
|                   | O1 – C13       | 1.238 (3)   |
|                   | N3 – C14       | 1.468 (3)   |
|                   | N3 – C13       | 1.340 (3)   |
|                   | C14 – N3 – C13 | 120.48 (19) |
| Bond angles (deg) | O2 – N4 – C17  | 116.19 (18) |
|                   | O1 – C13 – C7  | 121.1 (2)   |
|                   | N1 – C1        | 1.328 (3)   |

**Table S3** Photophysical data of complexes **1-2**, **1a-2a**<sup>a</sup>

| Compounds                                              | Medium             | $\lambda_{\text{abs, max}}$ | $\lambda_{\text{em, max}}$ | $\Phi_{\text{em}}^{\text{b}}$ | $\tau_{\text{av}}^{\text{c}}/\text{ns}$ |
|--------------------------------------------------------|--------------------|-----------------------------|----------------------------|-------------------------------|-----------------------------------------|
| <b>1</b>                                               | PBS                | 457                         | 623                        | 0.082                         | 739.07                                  |
|                                                        | CH <sub>3</sub> CN | 456                         | 617                        | 0.070                         | 174.65                                  |
| <b>1a</b>                                              | PBS                | 435                         | 628                        | 0.068                         | 715.36                                  |
|                                                        | CH <sub>3</sub> CN | 432                         | 625                        | 0.052                         | 174.19                                  |
| <b>2</b>                                               | PBS                | 450                         | 622                        | 0.066                         | 529.32                                  |
|                                                        | CH <sub>3</sub> CN | 449                         | 615                        | 0.048                         | 144.68                                  |
| <b>2a</b>                                              | PBS                | 450                         | 627                        | 0.064                         | 527.18                                  |
|                                                        | CH <sub>3</sub> CN | 449                         | 614                        | 0.054                         | 139.21                                  |
| [Ru(bpy) <sub>3</sub> ](PF <sub>6</sub> ) <sub>2</sub> | PBS                | -                           | 632                        | 0.042                         | 363.99                                  |
|                                                        | CH <sub>3</sub> CN | -                           | 615                        | 0.062                         | 161.68                                  |

<sup>a</sup> Quantum yields of luminescence at room temperature were calculated according to literature procedures.<sup>3</sup> All emission decays were obtained on freshly prepared samples at  $2 \times 10^{-5}$  M concentration. <sup>b</sup> Solutions of [Ru(bpy)<sub>3</sub>](PF<sub>6</sub>)<sub>2</sub> were used as the standard, PBS ( $\Phi_{\text{m}} = 0.042$ )<sup>4</sup>, CH<sub>3</sub>CN ( $\Phi_{\text{m}} = 0.062$ )<sup>5</sup> and CH<sub>2</sub>Cl<sub>2</sub> ( $\Phi_{\text{m}} = 0.059$ )<sup>6</sup>. <sup>c</sup> Decay curves of compounds were recorded by an Edinburgh FLS 920 spectrometer.

**Table S4** The  $^1\text{O}_2$  quantum yields ( $\Phi_\Delta$ ) of **1**, **1a**, **2**, **2a** in aerated DMSO

| Compounds | $\Phi_\Delta^a$ |
|-----------|-----------------|
|           | 450 nm          |
| <b>1</b>  | 0.80            |
| <b>1a</b> | 0.71            |
| <b>2</b>  | 0.58            |
| <b>2a</b> | 0.47            |

<sup>a</sup> MB was used as the reference in the  $\Phi_\Delta$  measurements (0.52 in aerated DMSO).

**Table S5** Cellular uptake efficiency of **1,1a,2,2a** measured by ICP-MS.

| Complex   | Amount of iridium (ng/10 <sup>6</sup> cells) |             |
|-----------|----------------------------------------------|-------------|
|           | 12h                                          | 24h         |
| <b>1</b>  | 65.13±0.79                                   | 147.97±0.25 |
| <b>1a</b> | 16.25±0.85                                   | 65.92±0.83  |
| <b>2</b>  | 1.61±0.12                                    | 2.78±0.25   |
| <b>2a</b> | 1.57±0.17                                    | 3.95±0.14   |

## References:

- [1] J. M. Wessels, C. S. Foote, W. E. Ford and M. A. Rodgers, *Photochem. Photobio.*, 2008, **65**, 96-102.
- [2] T. Mosmann, *J. Immunol. Methods.*, 1983, **65**, 55-63.
- [3] G. A. Crosby and J. N. Demas, *J. Phys. Chem.*, 1971, **75**, 991-1024.
- [4] D. Pucci, A. Bellusci, A. Crispini, M. Ghedini, N. Godbert, E. I. Szerba and A. M. Talarico, *J. Mater. Chem.*, 2009, **19**, 7643-7649.
- [5] D. S. Tyson and F. N. Castellano, *J. Phys. Chem. A.*, 1999, **103**, 10955-10960.
- [6] J. Van Houten and R. J. Watts, *J. Am. Chem. Soc.*, 1976, **98**, 4853-4858.
